## FRONT MATTER

### Title

- Synergizing algorithmic design, photoclick chemistry and multi-material volumetric printing for accelerating complex shape engineering
- Algorithmic design of multi-material volumetrically printed shapes

### Authors

Parth Chansoria<sup>1</sup>, Dominic Rüttsche<sup>1,2</sup>, Anny Wang<sup>1,3</sup>, Hao Liu<sup>1</sup>, Davide D'Angella<sup>3</sup>, Riccardo Rizzo<sup>1</sup>, Amelia Hasenauer<sup>1</sup>, Patrick Weber<sup>1</sup>, Nafeesah Bte Mohamed Ibrahim<sup>1</sup>, Nina Korshunova<sup>3</sup>, Marcy Zenobi-Wong<sup>1\*</sup>

\*Correspondence: [marcy.zenobi@hest.ethz.ch](mailto:marcy.zenobi@hest.ethz.ch)

### Affiliations

<sup>1</sup>Department of Health Sciences and Technology, ETH Zürich, Switzerland

<sup>2</sup>Department of Surgery, University Children's Hospital, Switzerland

<sup>3</sup>Hyperganic Group GmbH, Munich, Germany

### ORCIDs

Parth Chansoria (<https://orcid.org/0000-0002-6107-6848>)

Dominic Rüttsche (<https://orcid.org/0000-0001-6394-201X>)

Anny Wang (<https://orcid.org/0000-0002-3588-7647>)

Hao Liu (<https://orcid.org/0000-0002-8301-6870>)

Davide D'Angella (<https://orcid.org/0000-0001-5713-9837>)

Riccardo Rizzo (<https://orcid.org/0000-0001-8297-6776>)

Amelia Hasenauer (<https://orcid.org/0000-0003-4512-6195>)

Patrick Weber (<https://orcid.org/0000-0003-3626-000X>)

Nafeesah Bte Mohamed Ibrahim (<https://orcid.org/0000-0001-9582-4931>)

Nina Korshunova (<https://orcid.org/0000-0002-4261-9122>)

Marcy Zenobi-Wong (<https://orcid.org/0000-0002-8522-9909>)

### Abstract

Accelerating the designing and manufacturing of complex shapes has been a driving factor of modern industrialization. This has led to numerous advances in computational design and modeling and novel additive manufacturing (AM) techniques that can create complex shapes for bespoke applications. By combining a new coding-based design approach with high-throughput volumetric printing, we envision a new approach to transform the way we design and fabricate complex shapes. Here, we demonstrate an algorithmic voxel-based approach, which can rapidly generate and analyze porous structures, auxetic meshes and cylinders, or perfusable constructs. We use this design scheme in conjunction with new approaches for multi-material volumetric printing based on thiol-ene photoclick chemistry to rapidly fabricate complex heterogeneous structures. Collectively, the new design and fabrication technique we demonstrate can be used across a wide-spectrum of products such as actuators, biomedical implants and grafts, or tissue and disease models.

## 47 Teaser

48 A new scheme of rapidly designing and printing complex multi-material structures for  
49 implant and tissue graft applications.

## 51 Introduction

52 Designing and manufacturing complex shapes at increased throughput has been a key  
53 challenge of modern engineering. This is highly relevant in the field of biomedical implants  
54 and grafts. Using advanced computer-aided design (CAD) and computational modeling  
55 (CM) tools, complex implants are being developed which offer better mechanics (reduced  
56 weight and increased load-bearing capability, etc.) or patient safety and comfort, as  
57 replacements of simpler implants. For example, the designs of arterial stents have  
58 transitioned from the conventional porous shapes to auxetic architectures (1, 2), which allow  
59 easy radial expansion of the stents while reducing the risk of stent malapposition and  
60 foreshortening (1). Such auxetic shapes have also recently paved the way to a new range of  
61 patches and tissue grafts for regenerative applications such as those repairing cardiac (3)  
62 and pulmonary pathologies (4), where auxetic patches allow easy conformation to organ  
63 deformation and outperform non-auxetic patches (5). In addition, auxetic structures are  
64 increasingly being used as actuators (6, 7) or load-bearing structures (8, 9). Furthermore,  
65 advanced CAD and CM tools are increasingly being used in tissue engineering to design  
66 complex perfusable structures, such as perfusable vascularized biomimetic tissue models  
67 for studying biogenesis and disease progression and treatment (10, 11). Unfortunately, to  
68 this date, CAD and CM still largely require manually defining the complex geometrical  
69 relationships and boundary conditions. Furthermore, one needs to analyze a wide array of  
70 design iterations to derive the optimized design for the application. For example, auxetic  
71 patches developed for different dynamic organs (lung, heart, etc.) need to conform to the  
72 stiffness and Poisson's ratios of the different organs, and may require analyzing hundreds  
73 of design iterations and their computational modeling to find the right patch design for an  
74 organ (4). Herein, we present a new algorithmic approach to designing complex shapes  
75 within seconds, which can rapidly generate a large array of design iterations within minutes.

76  
77 To fabricate the complex shapes, additive manufacturing techniques involving layer-by-  
78 layer material deposition offer a wide range of achievable resolution (typically 10 – 500  
79  $\mu\text{m}$ ) and throughput (0.01 – 1000  $\text{mm}^3/\text{hr}$ ). Recently, volumetric printing (VP), also termed  
80 as volumetric additive manufacturing, has emerged as a powerful technique towards the  
81 fabrication of high-resolution structures (up to 100  $\mu\text{m}$ ) within tens of seconds. VP relies  
82 on computed axial lithography, where the vial containing photocrosslinkable resin  
83 (photoresin) is rotated with dynamically evolving light patterns (images) projected into the  
84 resin (12–14). The superposition of the projected images leads to a spatially localized  
85 increase in the free radicals produced from the photoinitiator, which induces crosslinking of  
86 the photoresin into the desired shape. The photo-rheology of the resins used in VP typically  
87 depicts a non-linear response, where the crosslinking is induced after a threshold of light  
88 dose is achieved. There are also non-rotational methods involving image projections from  
89 multiple sides (typically front, side and bottom) to generate a spatially localized increase in  
90 light dose within the photocrosslinkable matrix, which induces crosslinking of the material  
91 into the desired shape (15, 16). Compared to multi-direction projections, computed  
92 tomography leads to better resolution and shape fidelity of the printed construct as the image  
93 can be changed continuously (12). We recently demonstrated that the tomographic printing  
94 duration can be further reduced to only a few seconds by using thiol-ene photoclick  
95 chemistry-based resins (17). Herein, insensitivity to oxygen and a homogeneous network  
96 formation within the step-growth polymerized matrices can reduce internal structural

97 stresses and shrinkage after printing compared to constructs resulting from chain-growth  
98 polymerization (17, 18). Further, refractive index (RI) matching (19) and fine-tuning of light  
99 dose (20) has enabled high resolution printing while allowing encapsulation of high density  
100 of cells and organoids (19), which are critical to biomimetic tissue engineering. In an  
101 attempt to set a roadmap for high throughput design and fabrication of biomedical implants  
102 and grafts, we demonstrate how the complex algorithmically designed structures can be  
103 rapidly synthesized using photoclickable gelatin-based matrices within VP.

104  
105 Furthermore, applications of VP have been limited to constructs based on single material  
106 compositions, and there is a critical need for new methods to fabricate multi-material  
107 structures, which can widen the applicability of VP into biomimetic structures as well as  
108 tissue and disease models. In this work, we demonstrate new approaches for multimaterial  
109 VP (Multimat VP). We print selected architectures with different photoresin compositions  
110 along the length or the thickness of the constructs. Further we demonstrate how the designs  
111 can be wrapped around more complex objects such as a heart, which paves the way for  
112 rapidly printing organ-specific auxetic meshes. Finally, we also highlight how complex  
113 multimaterial perfusable architectures such as alveoli can be rapidly designed and fabricated  
114 using our approach. The synergy of algorithmic design, photoclick chemistry and Multimat  
115 VP (**Figure 1**) offers a transformational approach to rapidly designing and fabricating  
116 complex multimaterial shapes.  
117  
118

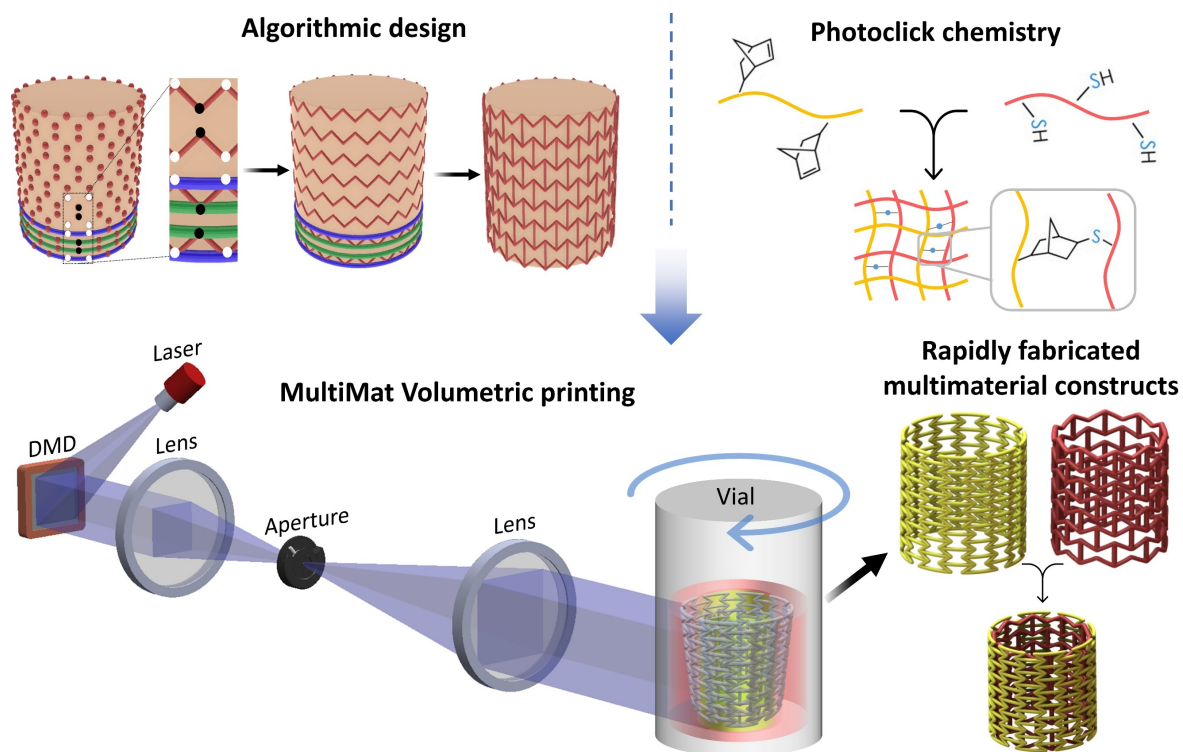

119 **Figure 1. Schematic of the proposed concept to rapidly design and fabricate complex structures.**  
120 Algorithmic design is used to rapidly create large arrays of design iterations, photoclick chemistry-based  
121 bioresins allow rapid fabrication of constructs, and multi-material volumetric printing (Multimat VP) approach  
122 rapidly fabricates complex constructs made from heterogenous resin compositions.  
123

## 128 Results

### 129 *Rapid algorithmic design and multimaterial volumetric printing of auxetic meshes*

130 Auxetic shapes serve as an ideal template for algorithmic design as the structural  
131 interrelationships can be defined via governing equations. 2D auxetic meshes have been  
132 increasingly utilized as patches which feature tailorable negative Poisson's ratios and  
133 directional stiffness to easily conform to dynamic organs such as the lung (4) or the heart  
134 (3, 21). **Figure 2A** illustrates the algorithmic design scheme for auxetic meshes featuring  
135 re-entrant honeycomb, sinusoidal ligaments, arrowhead and pinwheel meshes. All of these  
136 meshes feature different stiffness and Poisson's ratios, which can be selectively matched to  
137 different dynamic organs (e.g., lung, heart, stomach, bladder, etc.) (4, 5). The equations  
138 governing the design algorithms have been provided in the Supplemental Information.  
139 Briefly, for re-entrant honeycomb meshes, vertical baselines containing the vertices of the  
140 mesh elements are established at a defined separation, followed by offsetting the position  
141 of every alternate vertex either ahead (positive offset) or behind (negative offset) the  
142 baseline. Herein, every consecutive baseline has opposing offsetting of the vertices (i.e., if  
143 the vertex at any baseline has a positive offset from the vertex, then the consecutive baseline  
144 will have a negative offset from the vertex). Next, the vertices are connected along the  
145 vertical direction, followed by connecting alternate vertices which are at positive and  
146 negative offset, along the horizontal direction. For the arrowhead architectures, the meshes  
147 are offset such that each baseline features the same offset pattern of the vertices. The vertices  
148 are then connected such that the negative offset vertices of any baseline are connected to  
149 the positive offset vertices along the consecutive baseline. For creating the sinusoidal  
150 ligament meshes, sine functions are created with period length ( $2\pi$ ) spanning two baselines,  
151 and the sinusoidal mesh in every other baseline is shifted by a phase spanning the distance  
152 between two consecutive baselines. The pinwheel meshes are fabricated in a similar way,  
153 except there is no offset between the sinusoids across the baselines. In **Figure 2B**, we  
154 present select architectures created by changing dimensions of the auxetic design features.  
155 Using this algorithmic approach, several hundred iterations of any auxetic mesh can be  
156 rapidly created (average compilation time per design on a personal computer at 1.3 GHz  
157 and 32 GB RAM was 0.04 s).

158  
159 With auxetic meshes as the template, we present the first scheme for the rapid Multimat VP  
160 (**Figure 2C**). Here, the inner mesh is created using tomographic projections in a vial filled  
161 with thermo-reversibly crosslinked rhodamine-labeled fluorescent resin containing  
162 norbornene-modified gelatin (GelNB) and thiolated gelatin (GelSH) at 5% w/v (total gelatin  
163 content) in phosphate buffered saline (PBS) (see dose optimization and resolution tests for  
164 different photoclick materials in **Figure S1**). After the first tomographic projection, the  
165 mesh is localized in the resin container by projecting supporting beams (created by  
166 projecting a circular image ( $\Phi = 3$  mm) for 5 s without rotating the vial) at the top of the  
167 mesh. This prevents the printed structure from falling when the vial is heated up to 37°C  
168 to remove the non-photocrosslinked resin. The resin in the container is then interchanged  
169 with a FITC (fluorescein isothiocyanate)-labeled resin, followed by tomographic projections  
170 of the outer mesh. Addition of either Rhodamine or FITC did not affect the absorption of light  
171 at 405 nm and the RI of the resin (RI = 1.34 for GelNB/GelSH), thereby not affecting the  
172 light path during tomographic projections. **Figure 2D** demonstrates the rapidly fabricated  
173 (25 s total printing time) bi-layered auxetic mesh comprising of different resin compositions  
174 (Rhod-labeled and FITC-labeled GelNB/GelSH) and vertically and horizontally oriented re-  
175 entrant honeycomb meshes in the first and second layers, respectively. The images have  
176 been captured using light sheet microscopy (22), and the supporting pillars facilitate image  
177 capturing by stabilizing the constructs within the printing vials. Notably, post



178 photocrosslinking, the RI of the GelNB/GelSH resin increases by  $\sim 0.002$  (i.e., RI = 1.342),  
 179 which, as per our observations, did not critically affect the feature dimensions. The  
 180 minimum feature size of the second layer ( $\sim 275 \mu\text{m}$ ) was within  $\pm 5\%$  as that of the first  
 181 layer ( $\sim 264 \mu\text{m}$ ).  
 182

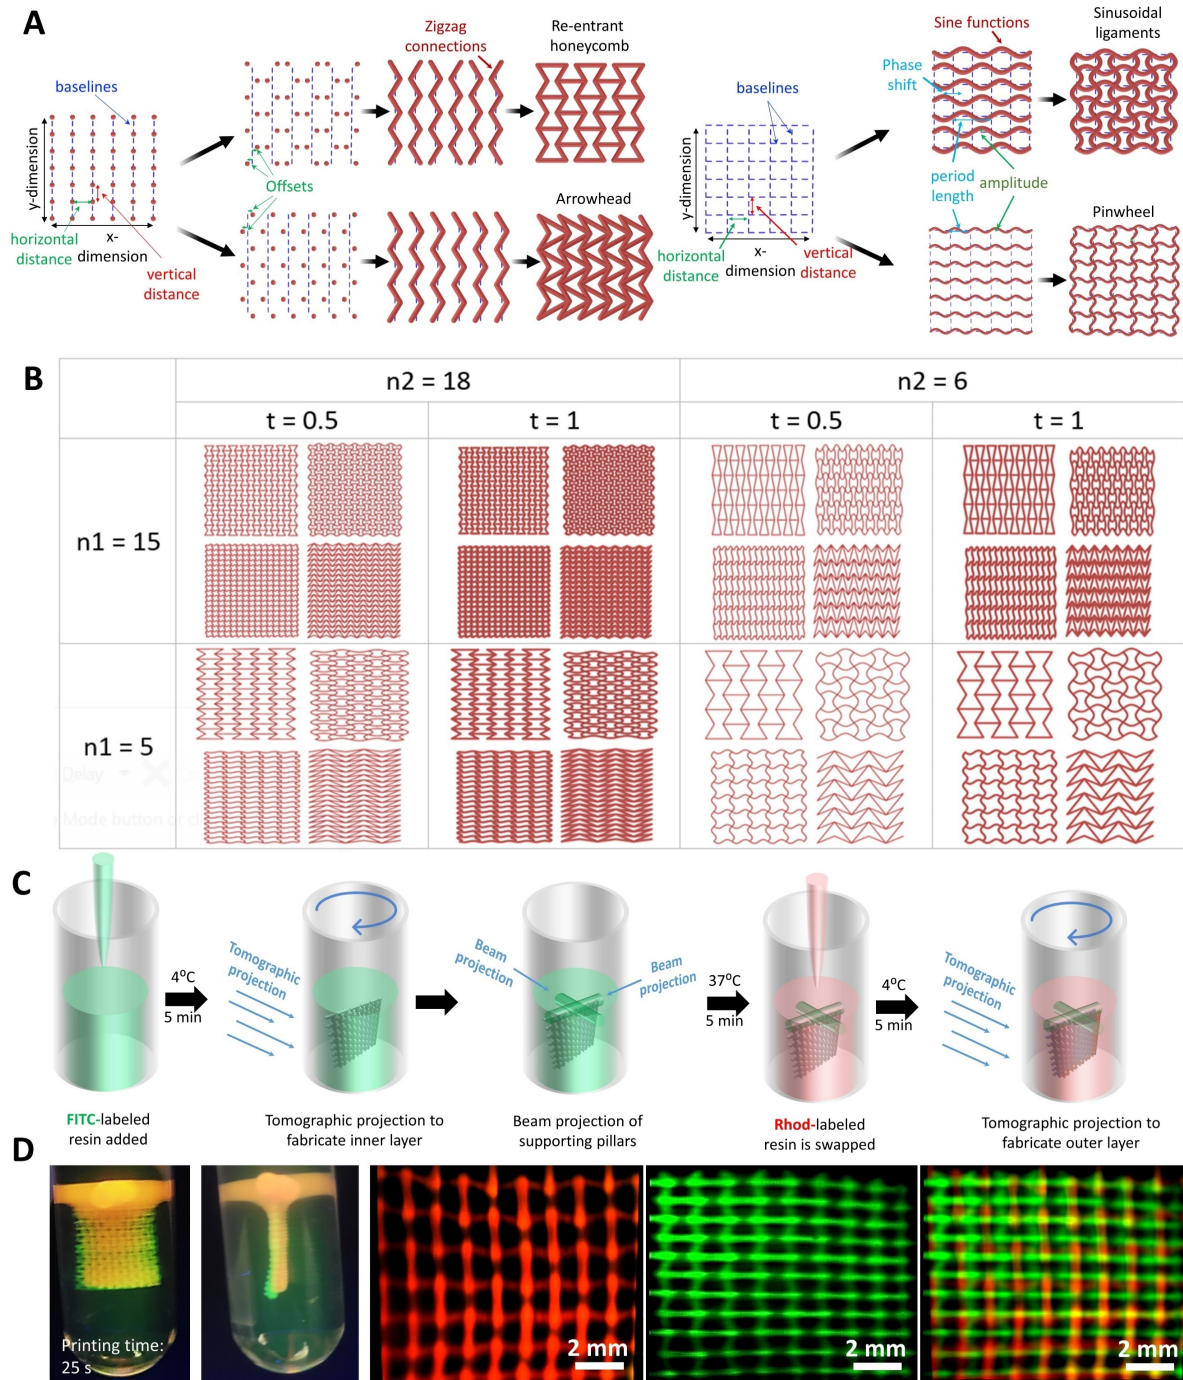

183  
 184 **Figure 2. Rapid design and fabrication of auxetic meshes.** **A.** Design rationale for creating different auxetic  
 185 meshes – Re-entrant honeycomb, arrowhead, sinusoidal ligaments and pinwheel (see **Supplemental**  
 186 **Information** for governing equations). **B.** Rapidly generated design iterations for the auxetic architectures by  
 187 varying select design parameters ( $n_1$ ,  $n_2$  and  $t$  represent the number of vertical and horizontal elements, and  
 188 thickness of the elements, respectively). **C.** Scheme of fabrication of the multimaterial auxetic meshes  
 189 featuring different designs and resin compositions along the thickness. **D.** Rapidly fabricated (25 s printing  
 190 time) auxetic meshes featuring horizontally and vertically oriented re-entrant auxetic meshes made of  
 191 Rhodamine (Rhod)-labeled, FITC-labeled GelNB/GelSH resins, respectively, along the thickness. Images of the  
 192 meshes have been captured using light sheet microscopy.

193  
194  
195  
196  
197  
198  
199  
200  
201  
202  
203  
204  
205  
206  
207  
208  
209  
210  
211  
212  
213  
214  
215  
216  
217

Of note, the supporting pillars in the first Multimat VP scheme need to be removed post printing. The second printing scheme for Multimat VP does not require projection of supporting pillars. This scheme is demonstrated in **Figure 3A**. The scheme utilizes filling the first resin in the printing vial, followed by adding the second resin. Here, the two resin compositions are prevented from mixing into each other through thermo-reversible crosslinking of each resin formulation at 4°C prior to adding the subsequent one. Alternatively, a high viscosity resin could also be used to prevent mixing of the resins during the short printing duration. After the different resins are added, the entire construct is printed at once via tomographic projections (printing time 12 s). We use this Multimat VP technique to fabricate a re-entrant honeycomb mesh with vertically oriented elements featuring FITC and Rhod-labeled GelNB/GelSH resin in the bottom and top portions, respectively (**Figure 3B**). Of note, the supporting beams are still added to the construct to suspend it within the printing vial, which facilitates its imaging using light sheet microscopy. Here, gelatin-based resin has been used since it allows the layers to thermo-reversibly crosslink when the temperature is reduced, thereby preventing the photocrosslinked structures from falling under their own weight due to gravity. The gelatin could also be replaced with other materials such as pluronic or hyaluronic acid, etc., provided they increase the viscosity substantially to prevent the structures from displacing during the short printing duration. This Multimat VP approach can be used to print tissue interfaces. As an example, we printed the same auxetic mesh with GelNB/GelSH across the top and bottom, but the top compartment consisted of myoblasts (C2C12 murine), and the bottom compartment consisted of fibroblasts (3T3 murine), labelled with cell tracker red and green, respectively. After 4 weeks of maturation, the top compartment selectively exhibited myo-heavy chain staining, while both compartments featured collagen I staining (**Figure 3D**).



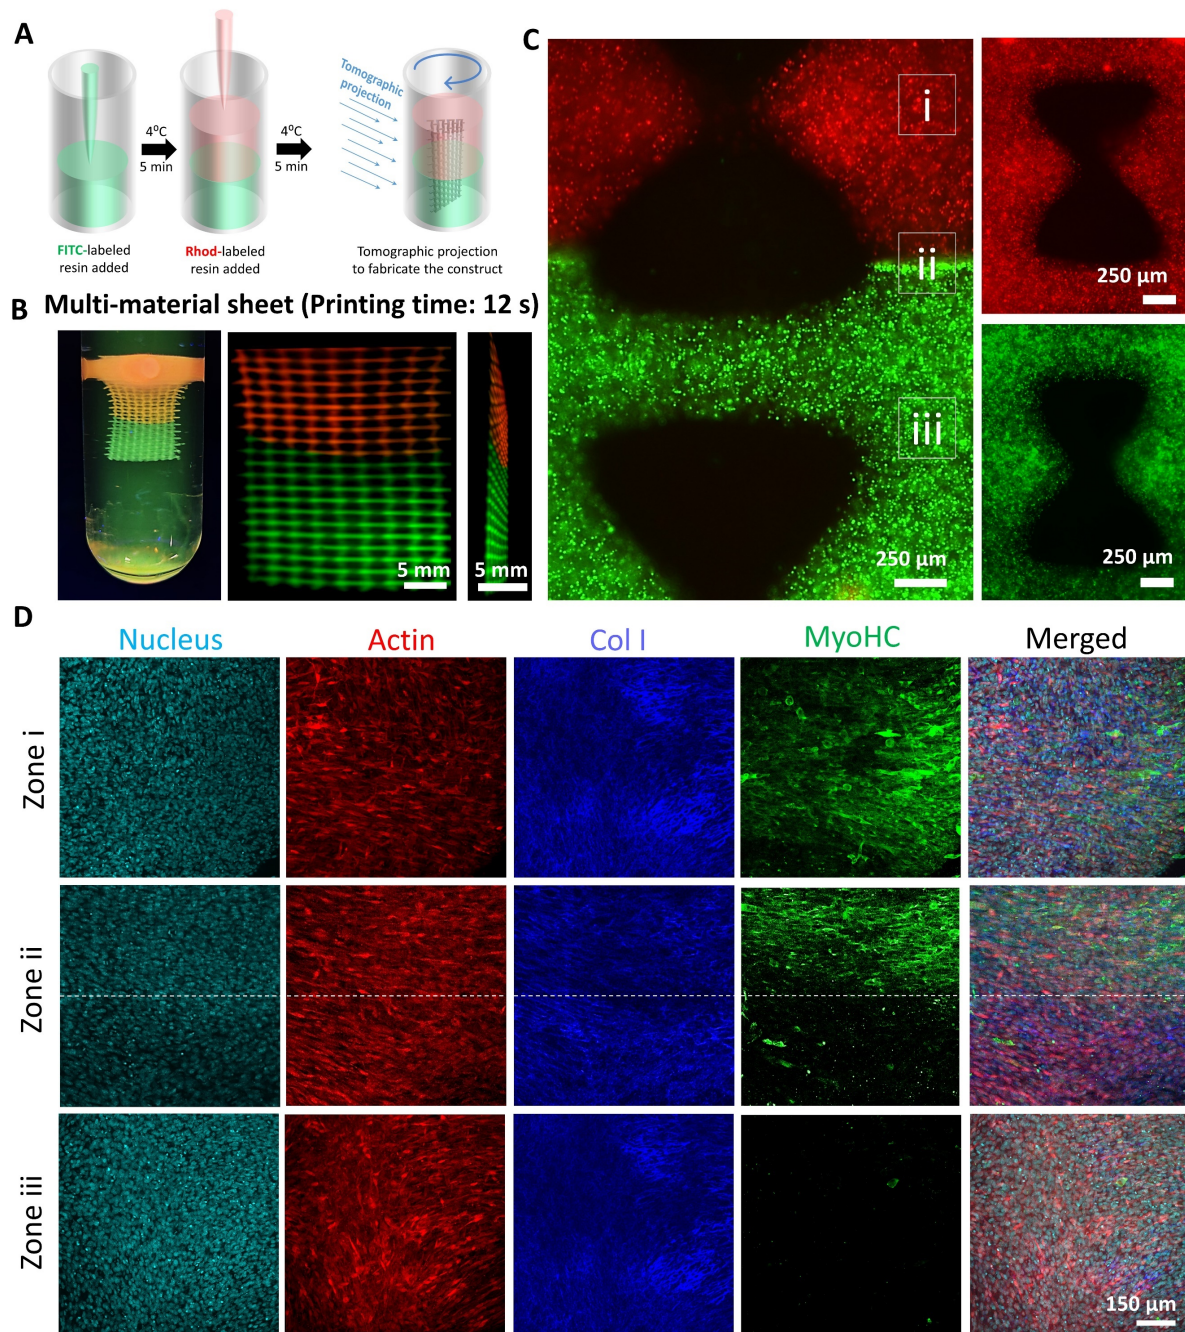

**Figure 3. Fabrication of auxetic meshes featuring different resin compositions across the length of the meshes.** **A.** Scheme of filling different resin compositions and printing the entire construct at once. **B.** Printed constructs featuring Rhod-labeled or FITC-labeled GelNB/GelSH matrix across the two layers. **C.** Micrographs of muscle-connective tissue model made of GelNB/GelSH resin. The top and bottom portions comprise of C2C12 myoblasts labeled with cell tracker red and 3T3 fibroblasts labeled with cell tracker green, respectively. **D.** After 4-week long culture in DMEM containing 2% w/v horse serum, the muscle-mimicking mesh containing C2C12 cells (Zone i) exhibits Myosin heavy chain (MyoHC) staining. The interface at Zone ii shows the distinction in MyoHC staining across the two layers, whereas the connective tissue-mimicking mesh containing 3T3 cells (Zone iii) does not demonstrate MyoHC staining.

### *Rapid algorithmic design and multimaterial volumetric printing of auxetic cylinders*

Cylindrical auxetic meshes, such as those increasingly being used for fabrication of stents (1, 2) can be even more complicated to design when compared to 2D meshes, especially when the design elements need to form a continuum across a cylindrical contour. Here, creating design iterations of the auxetic cylinders is particularly challenging. **Figure 4A**

234 illustrates the algorithmic design scheme of cylindrical auxetic meshes featuring re-entrant  
235 honeycomb and sinusoidal ligament elements (detailed equations have been provided in the  
236 **Supplemental Information**). The design schemes of auxetic cylinders featuring arrowhead  
237 or pinwheel architectures have been provided in the **Supplemental Information** and  
238 **Figure S2**. For creating any auxetic mesh, we first convert the cartesian coordinate system  
239 to a cylindrical coordinate system to be able to create a cylinder and define points on it. For  
240 auxetic cylinders featuring vertically-oriented re-entrant honeycomb lattices, we create  
241 vertical zigzag lines by defining the coordinates of all corner points alternating on two sides  
242 of a base line (**Figure 4A**). The alternate corner points lie along parallel circles with a phase  
243 shift commensurate with the width of the re-entrant meshes. After all the corner points of  
244 the vertical zigzag lines are defined, these are connected with straight beams. To match the  
245 cylinder curvature, every point on the initial straight beam is translated onto the cylinder  
246 using a wrapping algorithm (details provided in the **Supplemental Information**). Finally,  
247 to create the horizontal beams, every second pair of neighboring points on each ring of the  
248 cylinder is connected by an arc using the same wrapping method, with the positions of the  
249 horizontal beams alternating along the axis of the cylinder. For auxetic cylinders featuring  
250 horizontally oriented re-entrant honeycomb meshes, the corner points of each zigzag ring  
251 are composed of two circles consisting of points with a certain phase shift and angular step  
252 to each other. After defining all corner points of the zigzag rings, these can be connected.  
253 Before generating the connecting beams, every beam between two corner points is  
254 translated onto the cylinder coat using the wrapping method used previously. Finally,  
255 vertical beams are constructed between neighboring zigzag rings. For the auxetic cylinders  
256 with sinusoidal ligament meshes, sinusoidal functions are created along the cylinder, with  
257 consecutive functions featuring a phase shift with the previous sinusoid. Next, a vertical  
258 sine wave is generated to create the auxetic cylinders with sinusoidal elements. The starting  
259 and ending points of a vertical line are on the crossing points of the bottom and top circles  
260 and their baselines respectively. Similar to the 2D auxetic meshes, this algorithmic design  
261 scheme allows us to create a wide array of cylinders within a matter of seconds (**Figure 4B**  
262 and **Figure S2**).

263 These auxetic architectures can also be printed within 12 s using photoclick resins within  
264 VP (**Figure 4C**). Using the first Multimat VP strategy of using support pillars to allow the  
265 construct to be suspended in the printing vial, which allows changing of the resin and re-  
266 printing, we also demonstrate how multimaterial and multidesign auxetic cylindrical meshes  
267 can be fabricated. **Figure 4D** demonstrates auxetic cylindrical meshes made of FITC-  
268 labeled GelNB/GelSH in the shape of horizontally-oriented re-entrant honeycomb mesh in  
269 the inner layer, and Rhod-labeled GelNB/GelSH in the shape of vertically-oriented re-  
270 entrant honeycomb mesh in the outer layer, respectively.



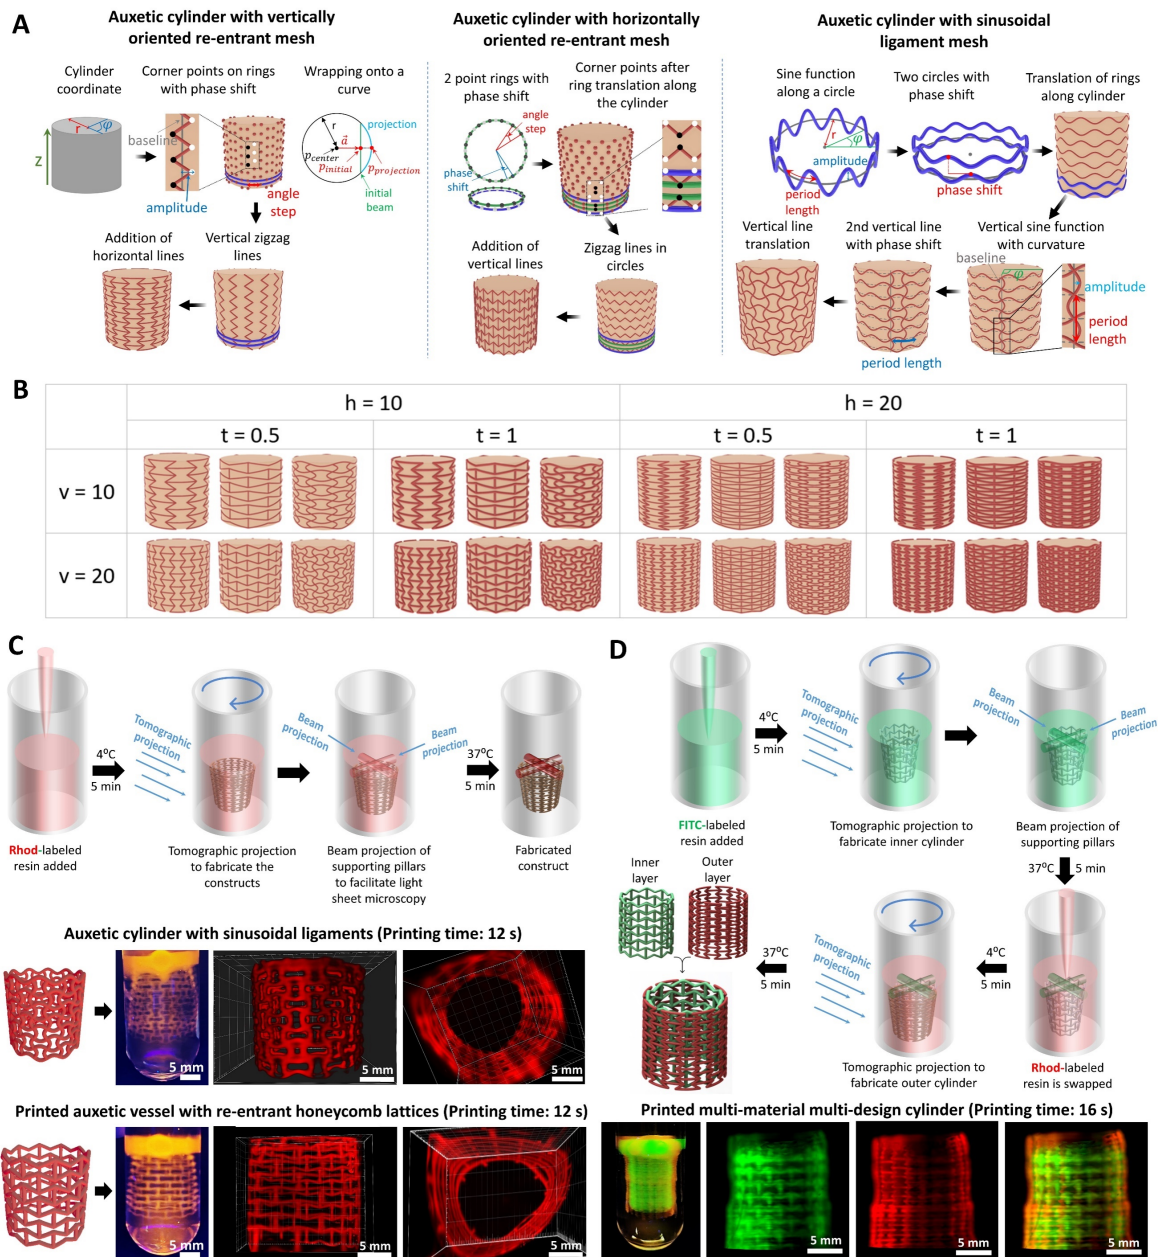

**Figure 4. Rapid design and fabrication of auxetic cylindrical meshes.** **A.** Algorithmic design rationales for the fabrication of auxetic cylindrical constructs featuring re-entrant and sinusoidal ligament meshes (see **Supplemental Information** for governing equations). **B.** Design arrays featuring selected iterations of the design parameters ( $h$ ,  $t$ , and  $v$  represent the number of horizontal lines from top to bottom, thickness of the elements, number of vertical lines in the ring, respectively). **C.** Rapid fabrication of select architectures using volumetric printing, and compiled micrographs of the printed architectures (images are captured using the light sheet microscopy). **D.** Resin swapping scheme for the fabrication of bi-layered cylindrical auxetic meshes and printed meshes demonstrating horizontally and vertically oriented re-entrant honeycomb architectures across the inner and outer layers, respectively.

### *Algorithmically-defined computational models for rapid screening of structural mechanics*

Similar to algorithmic design, we show that algorithmic computational modeling can also substantially accelerate the process of determining the mechanics of a wide array of complex structures. Here we use the auxetic meshes and cylinders as the templates for our finite cell method (23)-based computational models. As opposed to the conventional approaches, the embedded simulation approach eliminates the necessity of the labor-

290 intensive procedure for meshing and defining of boundary constraints. Instead, the geometry  
291 is embedded in a regular grid with vanishing stiffness. The physical model is then recovered  
292 by applying a voxel-based integration rule (24). Using this methodology allowed us to  
293 computationally model the auxetic meshes and cylinders at an average duration of  
294 approximately 4.5 s and 30 s, respectively, in a 1.3 GHz personal computer with 32 GB  
295 RAM. As a result, we were able to quickly derive the Poisson's ratios of thousands of  
296 auxetic structures without any manual intervention. The corresponding results have been  
297 shown in **Figure 5**. The deformation of selected meshes have been shown in **Figure 5A**. Of  
298 these, the re-entrant meshes demonstrate the widest range of Poisson's ratios (from 0.1 to -  
299 10.9, **Figure 5B**) based on the different combinations of the design features ( $n_1$ ,  $n_2$  and  $t$ ).  
300 In contrast to the auxetic meshes, the auxetic designs for cylinders (selected outputs are  
301 shown in **Figure 5C**) did not demonstrate negative Poisson's ratios, but a wide range of  
302 positive Poisson's ratios (**Figure 5D**). This means that the cylinders are actually contracting  
303 when they are stretched radially, even though the meshes feature auxetic designs. Here, the  
304 horizontally-oriented auxetic cylinders demonstrate Poisson's ratios varying from 0.2 to 1.1  
305 based on different combinations of the design features ( $h$ ,  $v$  and  $t$ ). Such a wide range of  
306 Poisson's ratios for the different meshes and cylinders offers unique applications such as in  
307 actuators (6, 7), large structural components (8, 9), implants (25, 26) or organ-specific  
308 patches (3, 4).

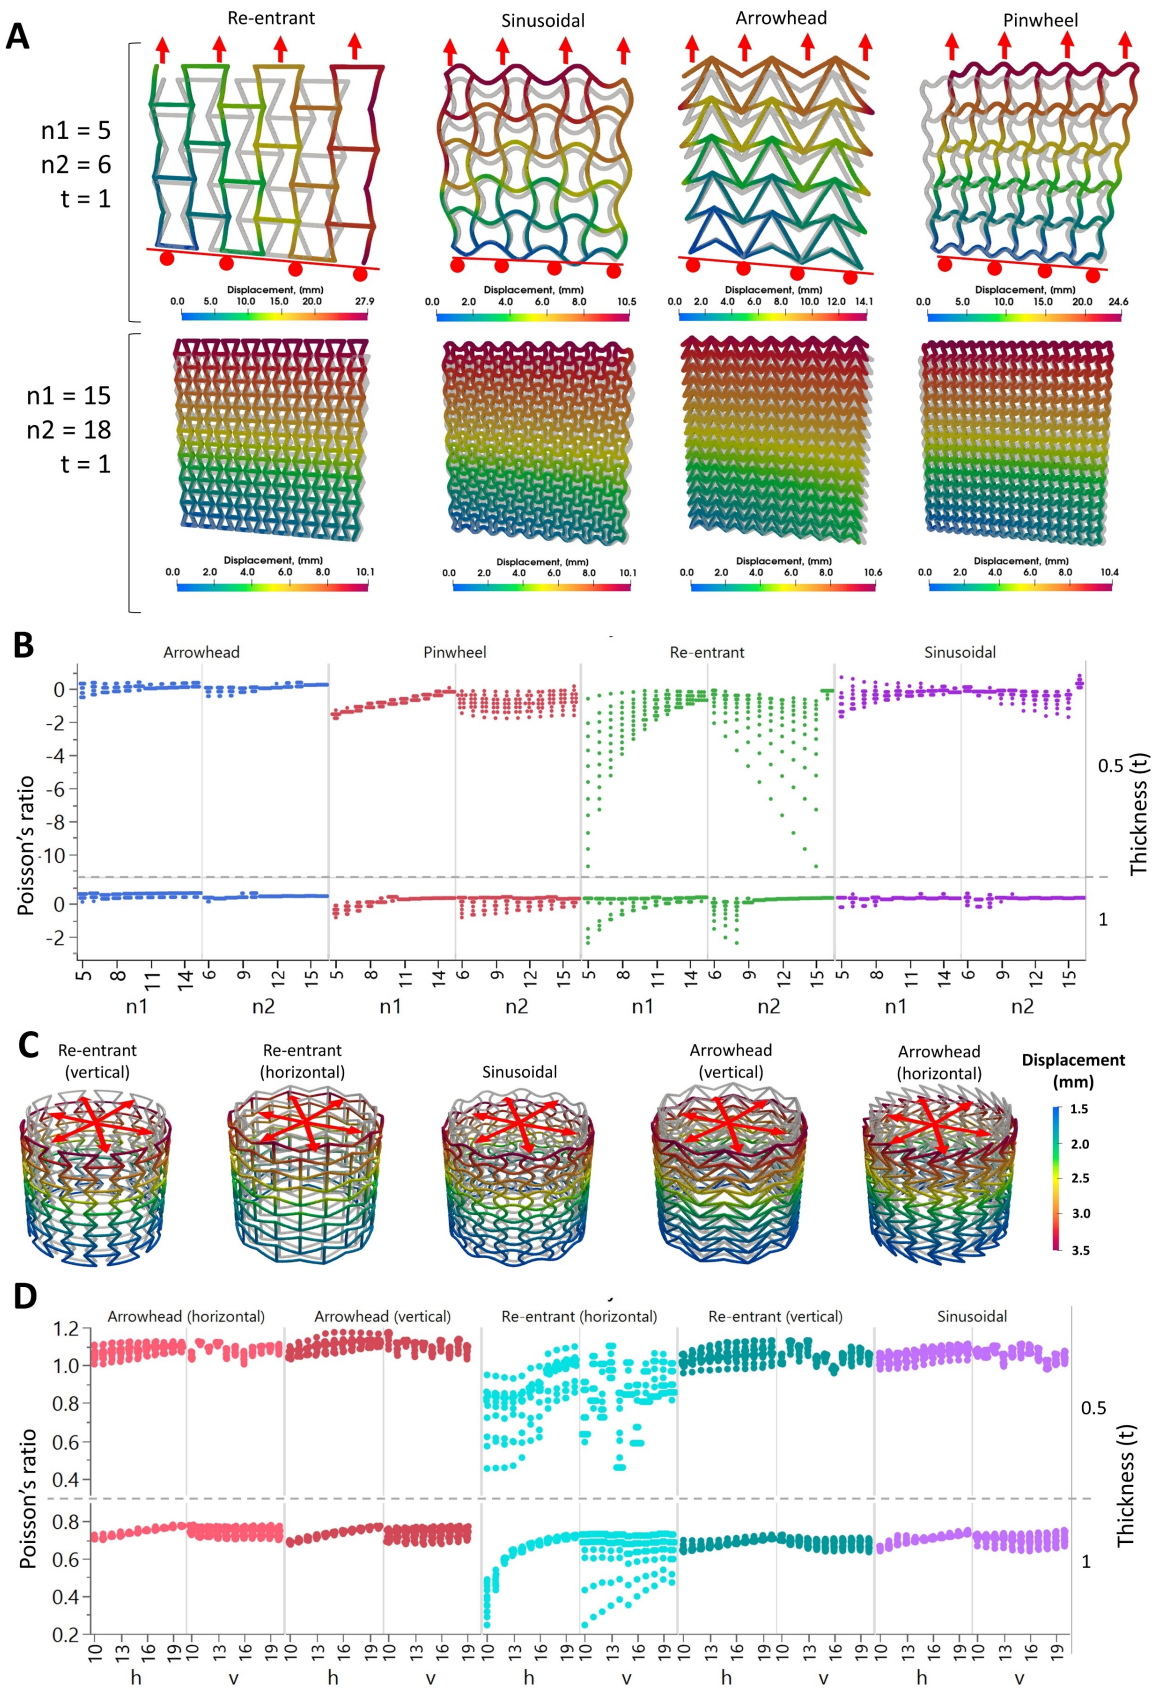

**Figure 5.** Algorithmically-derived computational estimates of structural mechanics (original mesh or cylinder is shown in grey). **A.** Selected computational outcomes ( $n_1$ ,  $n_2$  and  $t$  represent the number of vertical and horizontal elements, and thickness of the elements, respectively) demonstrating the negative Poisson's ratios of the structures (i.e., structures expand laterally when stretched longitudinally (Note: A roller constraint was applied on the bottom of the mesh to allow free lateral expansion)). **B.** Computational estimates of the Poisson's



315 ratios of the different auxetic meshes (244 designs were analyzed per auxetic mesh), based on different  
316 combinations of  $n_1$ ,  $n_2$  and  $t$ . Of note: The thickness has been plotted as a second y axis on the right. **C.**  
317 Selected computational outcomes of the auxetic cylinders. **D.** Computational estimates of the Poisson's ratios  
318 of the cylinders based on the different design parameters ( $h$ ,  $t$ , and  $v$  represent the number of horizontal lines  
319 from top to bottom, thickness of the elements, number of vertical lines in the ring, respectively; 1187 iterations  
320 were analyzed per cylinder). Thickness ( $t$ ) is plotted as a second y axis on the right

321  
322 *Organ-specific auxetic meshes*

323 To demonstrate the level of design complexity that the algorithmic schemes can address,  
324 we demonstrate how the auxetic meshes can be wrapped around more complex shapes such  
325 as the heart (**Figure 6A**). Here, we start with a square 2D auxetic mesh, which is intersected  
326 with a circle to derive a circular mesh. Then, all points of this circular mesh are wrapped  
327 onto a sphere. The formation of a curved mesh is an essential step, as it facilitates the  
328 wrapping algorithm to identify the points within the mesh closest to the surface of the heart  
329 models. After the curved is constructed, the heart model (in this case, a standard tessellation  
330 language (STL) file derived from an online repository(27)) is placed into the curved auxetic  
331 sheet such that they intersect slightly with each other, which improves the wrapping result  
332 in the next step. Finally, every point on the auxetic sheet is projected onto the bottom of the  
333 heart by computing the point on the heart surface with the smallest distance to a given point  
334 on the curved sheet. As with previous shapes, all the different kinds of auxetic meshes can  
335 be wrapped onto the heart this way (average design compilation time  $\sim 0.2$  s) (**Figure 6B**,  
336 also see **Figure S4** for additional shape iterations). The corresponding governing equations  
337 for the design schemes are provided in the Supplemental Information, and other simpler  
338 shapes such as spheres are shown in **Figure S3**. Here, we select the sinusoidal meshes to  
339 demonstrate their rapid printability over a heart model (**Figure 6C**). For this, we first  
340 volumetrically print a heart using unlabeled GelNB/GelSH resin, followed by projecting  
341 supporting pillars and swapping the non-photocrosslinked resin with Rhod-labeled  
342 GelNB/GelSH. The auxetic mesh around the heart is then rapidly volumetrically printed  
343 **Figure 6D**. Notably, the auxetic meshes in **Figure 6D** were printed directly over the heart  
344 to allow better visualization of the mesh by maintaining its shape. We foresee that such  
345 complex shapes may one-day pave the way for patient-specific grafts or patches which can  
346 conform to the shape of the organ.  
347



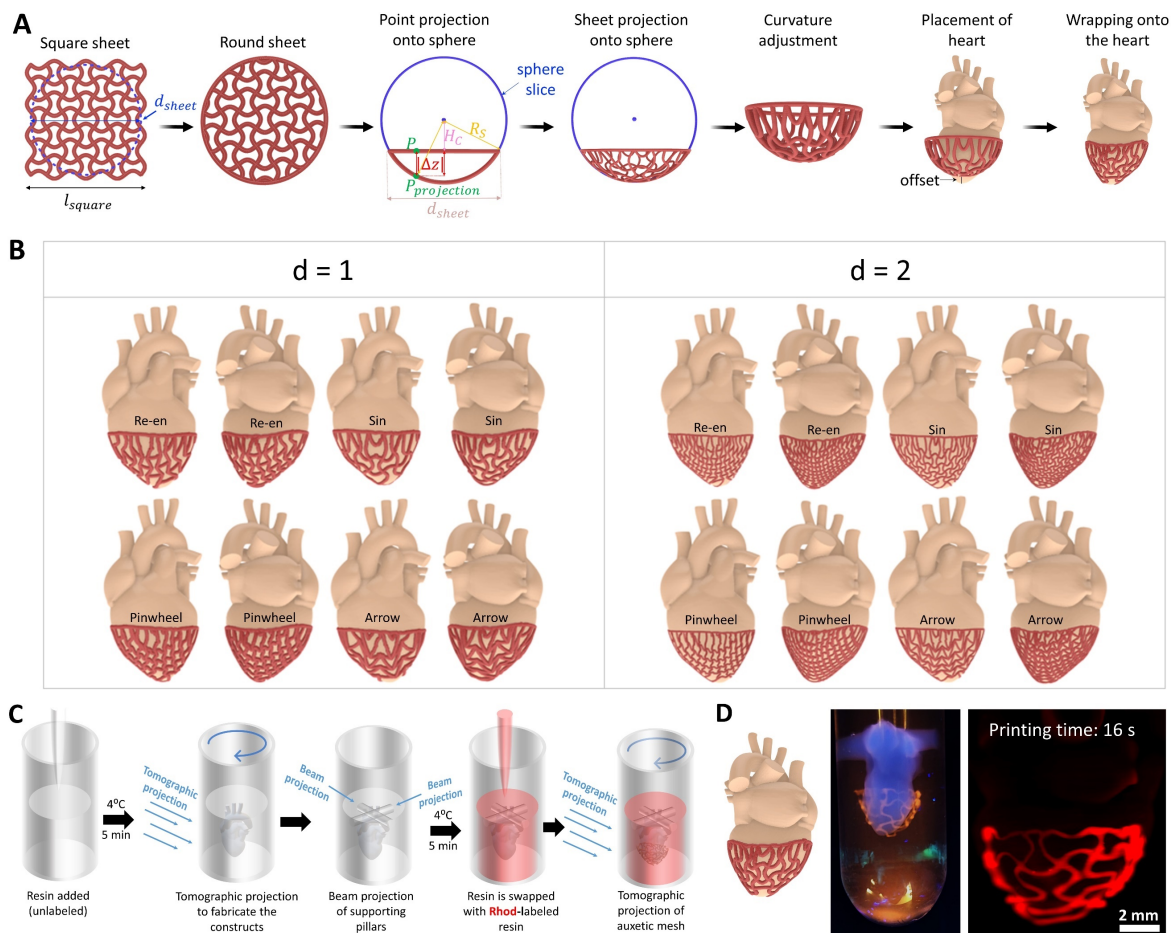

**Figure 6.** Creation of organ-specific auxetic meshes using wrapping algorithms. **A.** Rationale for the fabrication of the curved auxetic meshes and wrapping the same onto custom organ models (in this case, a heart). **B.** Design iterations of different auxetic meshes wrapped around the heart ( $d$  represents the density index of the auxetic structure). **C.** Resin swapping procedure for the fabrication of the heart construct with a wrapped auxetic mesh. **D.** Macroscopic image (left) and light sheet microscopy image (right) of the heart construct (non-labeled) with auxetic mesh (rhod-labeled) around it.

### Algorithmic design of perfusable architectures

Finally, we demonstrate how the algorithmic design and Multimat VP schemes can be used to design and fabricate simple and complex perfusable structures. In the first design scheme, we design a cuboid consisting of a hollow spheroidal center and six perfusable channels around the sphere. The channels are created as a hyperbolic sine function and a circular pattern is created by copying the sine functions 7 times around the center axis (**Figure 7A**). Next, the channels are mirrored with an offset in the middle, followed by connecting the mirrored and original parts through straight channels. By changing the amplitude of the hyperbolic sine function or the diameter of the channels, a variety of perfusable shapes can be created within seconds (**Figure 7B**). These channels are then removed from a cuboidal shape. In addition, a sphere with a pre-set offset with the channels is also removed from the cuboid to result in the perfusable construct with a hollow sphere in-between. To fabricate a construct featuring perfusable channels surrounding a matrix of different material, we introduce the third Multimat VP approach – prefabricated construct integration (**Figure 7C**). In this approach, a FITC-labeled GelNB/GelSH sphere is fabricated, followed by extracting the same and integrating within another resin container partially filled with unlabeled GelNB/GelSH resin. The resin is kept at  $24^\circ\text{C}$  to allow easy integration of the sphere. More unlabeled GelNB/GelSH resin is then filled over the construct, and the cuboidal construct

374 with hollow sphere and perfusable channels printed such that the pre-fabricated spherical  
375 construct is accommodated within the hollow spherical center in the construct. Perfusing  
376 Rhod-labeled GelNB/GelSH into the channels allows us to image the sample using light  
377 sheet microscopy, as shown in **Figure 7D**, where the central FITC-labeled sphere is  
378 surrounded by a network of Rhod-labeled channels. We foresee that such synergistic  
379 algorithmic design and Multimatch VP approach can find potential applications in disease-on-  
380 a-chip models, for instance, a tumor surrounded by a network of capillaries which  
381 demonstrate neovascularization to the tumor site. Such a model can be used to study the  
382 effects of biological (macrophages (28), exosomes (29), etc.) or non-biological therapeutics  
383 (30, 31) on tumor metastasis or angiogenesis.

384  
385 The algorithmic design framework is not just limited to simple perfusable shapes but can  
386 also be expanded to more complex shapes such as alveoli surrounded with a perfusable  
387 vessel network. The alveolus is created by dividing a sphere into several smaller spheres  
388 bound by the periphery of the sphere, followed by scaling-up individual spheres to create  
389 the budding alveolus structure (**Figure 7E**). The vessel network surrounding the alveolus is  
390 first created as a regular icosahedron (see governing equations in the Supplemental  
391 Information). Next, every equilateral triangle along the face of the icosahedron is divided  
392 into four identical equilateral triangles by connecting the midpoints of all edges. This  
393 process can be repeated to further divide the triangles and create denser structures with  
394 smaller hexagons. Then, for every equilateral triangle, its geometric center is connected with  
395 the midpoint of each edge to create the vessel network (**Figure 7E**). Further, to improve the  
396 quality of prints and avoid intersection with the top cylinder later, the vessel network on the  
397 top is enlarged by factor 2 to create a bigger opening (**Figure 7F**). A thickness gradient is  
398 introduced to the vessels, such that the thickness decreases gradually from the left and right  
399 ends of the shape towards the middle. Then every edge of the icosahedron is interpolated to  
400 create 11 equidistant intermediate points, i.e. 10 sub-beams per edge, followed by wrapping  
401 each onto the circumscribed sphere of the icosahedron. The result is a spherical vessel shape  
402 which can be used for wrapping. The alveolus is placed such that it is concentric with the  
403 vessel shape, and every beam on the vessel shape is interpolated into 10 sub-beams and  
404 wrapped onto the alveolus by computing the point on the alveolar surface with the smallest  
405 distance to a given point on the vessel network. Then a cylinder is created and placed on top  
406 of the alveolus, and inlet and outlet ports added such that the inlet/outlet port intersects with  
407 a branching point of the vessel network. We can also create an offset by using a larger  
408 alveolar shape for wrapping of the vessels, then placing a smaller alveolar shape  
409 concentrically for the final shape. By changing the offset, vessel diameters and their  
410 densities, we can generate a wide array of alveoli and surrounding vessel shapes (average  
411 design compilation time  $\sim 0.5$  s) as shown in **Figure 7G**. In the model we used for printing,  
412 we used a gap of 250  $\mu\text{m}$  between the alveolus and the vessels. The alveoli and the vessel  
413 network were removed from a cylindrical construct to create perfusable channels and a  
414 hollow portion to accommodate the alveolus. The alveolus construct for printing was also  
415 hollowed-out by removing a scaled-down shape from the original alveolus. The printing  
416 scheme utilized first printing the alveolar shape, using FITC-labeled GelNB/GelSH,  
417 followed by supporting pillar projection (**Figure 7H**). This was followed by swapping resin  
418 with unlabeled GelNB/GelSH and printing the hollow construct (see the printed constructs  
419 during different stages in **Figure S6**). Finally, Uncrosslinked Rhod-labeled GelNB/GelSH  
420 at 37°C is perfused in the channels (**Figure 7I**), and the entire construct exposed to 405 nm  
421 UV light to crosslink the resin in the channels. In our future work, we plan to print different  
422 vessel densities followed by seeding of epithelial cells to create lung-on-chip models, which  
423 can be used to study pulmonary pathologies (32).

424

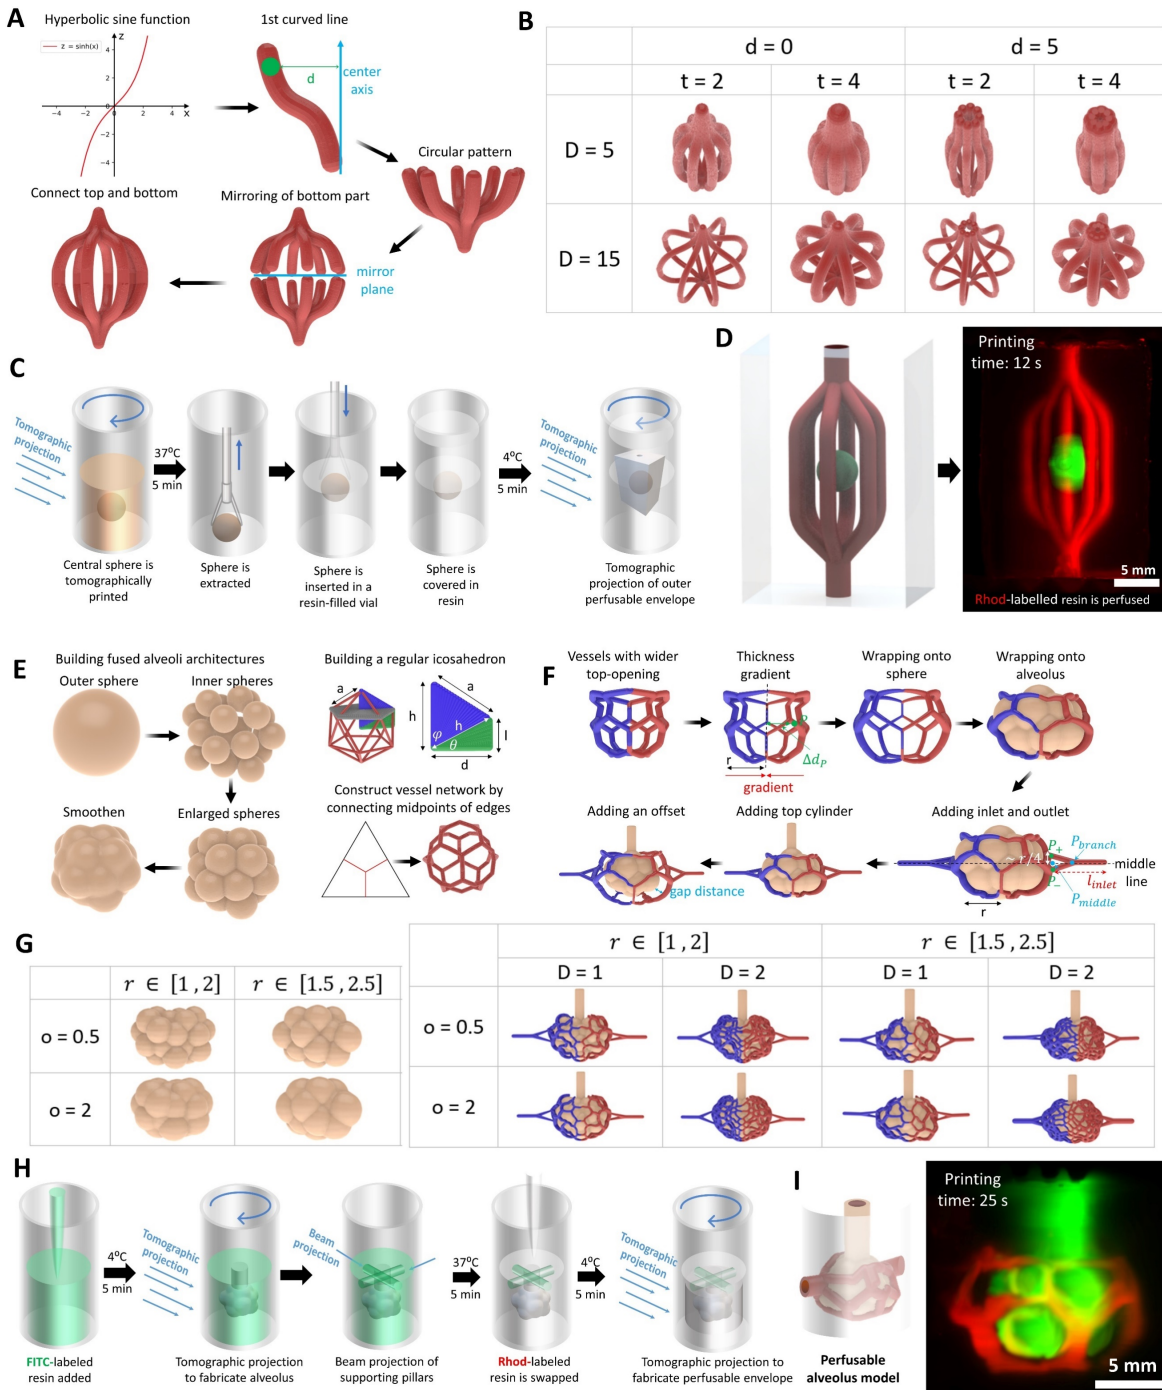

**Figure 7. Rapid design and fabrication of perfusable constructs.** **A.** Design rationale for simple perfusable architectures featuring multiple bifurcating channels. **B.** Select architectures made under iterations of design parameters ( $d$ ,  $t$  and  $D$  represent inlet channel diameter, thickness of individual channels and diameter of the offset of the channels at the center). **C.** Multimaterial VP scheme, where the central FITC-labeled sphere (GelNB/GelSH) is created first, and then transferred to another resin container pre-filled with unlabeled resin (GelNB/GelSH) and tomographic projections are performed. **D.** Volumetrically printed construct after perfusion with Rhod-labeled resin (images through light sheet microscopy). **E.** Scheme of fabrication of the alveolar budding structures and the perfusable channels. **F.** Wrapping of the perfusable channels around the alveolus. **G.** Shape iterations of alveolar structures ( $r$  represents radius of individual mini-spheres and  $o$  represents the offset of spheres w.r.t. each other) and the perfusable channels ( $D$  represents the density of capillaries) around the alveoli. **H.** Scheme of fabrication of the alveolar construct (also see supplemental **Figure S6**). **I.** Printed construct with FITC-labeled alveolus construct with perfused Rhod-labeled resin surrounding the construct (images captured through light sheet microscopy).

425  
426  
427  
428  
429  
430  
431  
432  
433  
434  
435  
436  
437  
438  
439



## 440 Discussion

441 The algorithmic design scheme offers a transformational approach towards facile creation  
442 of a wide array of complex shapes, such as the auxetic meshes and cylinders, organ-specific  
443 grafts or perfusable alveoli structures which we demonstrated in this work. The algorithms  
444 can rapidly process a wide array of point-point connections (such as wrapping functions,  
445 segmentation of icosahedron triangles into smaller triangles, connective lattice elements of  
446 auxetic shapes, etc.) which would be tedious and time-consuming to execute manually.  
447 Once the design scheme is established for any shape, the shapes can be easily iterated by  
448 inputting the ranges and increments for the important parameters, which is otherwise a  
449 daunting task to perform in conventional CAD softwares. This difference in designing and  
450 iterating is even more profound as the shape complexity increases, with the introduction of  
451 organ-specific auxetic meshes and the alveolar structures. Here the algorithms ensure that  
452 the interconnections between the constitutive points or contours are satisfied when a new  
453 shape iteration is formed. We have shown that algorithm-based computational modeling  
454 schemes can allow rapid screening of the mechanical properties of large arrays of complex  
455 architectures. Here, integration of the iterative algorithmic design and computational  
456 modeling within a deep learning framework can lead to a powerful framework for shape  
457 optimization(33). Our future work will entail expanding the computational modeling to  
458 simulate fluid flow within perfusable architectures.

459  
460 We have made the design and simulation code available in the GitHub repository (see “**Data  
461 and materials availability**” section). For users who are not adept at coding, we have created  
462 graphical user interfaces where the users can load their own models, to be able to design  
463 their own custom auxetic patches or perfusable networks with varying vessel densities.  
464 Using the interface, the users can also iterate the designs of the auxetic and perfusable  
465 shapes demonstrated in the present work for their own applications. In addition, dedicated  
466 libraries have been established which can be used for executing the structural simulations  
467 or for creating porosities within constructs (see **Figure S5**).

468  
469 In this work, we deployed three techniques for the rapid volumetric printing of multi-  
470 material constructs: **1.** Tomographic projection printing of first layer of the construct  
471 supported by projected pillars, followed by swapping of the uncrosslinked resin with a  
472 different composition and tomographic projection printing of the subsequent layer. **2.** Filling  
473 the printing vials with two different resin compositions and tomographic projection printing  
474 of the entire construct at once. **3.** Incorporating a prefabricated construct into a resin-filled  
475 container, followed by tomographic projections to fabricate the multimaterial constructs.  
476 The rationale for which Multimaterial VP method needs to be used would depend on the  
477 complexity of the structure that needs to be fabricated, and the resin composition. While the  
478 first scheme offers tremendous design freedom (we printed multi-material auxetic cylinders  
479 (Figure 4) auxetic mesh on heart (Figure 5) or perfusable alveolar models (Figure 6) using  
480 this method), aligning subsequent projections with the first projection is often challenging.  
481 Furthermore, removal of the supporting beams after printing can lead to material losses and  
482 may even be difficult to execute for fragile constructs. For multi-material constructs such  
483 as tissue interfaces, the second scheme can be a more robust scheme to align the two layers  
484 (such as the bilayered auxetic meshes in Figure 3). However, for resin compositions which  
485 do not undergo thermo-reversible crosslinking, the second scheme may cause mixing of the  
486 two resins across different regions, especially when the resin viscosity is low. In such a case,  
487 the remaining two strategies are a better choice. Notably, we have used the same base  
488 material of the resin when performing more than one tomographic projection to make the  
489 constructs (i.e., first and third strategy). Since the change in RI before and after crosslinking



490 of GelNB/GelSH resin was small ( $\Delta RI = 0.002$ ), we did not observe a substantial difference  
491 in resolution between the first and second projections. However, if the base material is  
492 different between the projections, the differences in RI between the photocrosslinked  
493 constructs can cause unwanted scattering or diffraction of light which may affect the print  
494 resolution and quality. Similar constraints may also apply to the third strategy of  
495 prefabricated construct integration. In this case, RI matching agents such as Iodixanol (19)  
496 can be used to fine-tune the RI of the resins and achieve high resolution prints.

497  
498 While we only demonstrated two resin compositions within the printed constructs in the  
499 present work, the techniques can be easily adapted to more than two material compositions  
500 to create more complex constructs. For example, bioinks pertaining to bone, tendon and  
501 muscle can be sequentially added into the print vial for the fabrication of bone-tendon-  
502 muscle interfaces. Here, while the bone construct could feature a porous matrix (see  
503 foaming algorithm outcomes in **Figure S5**), a fascicular arrangement of muscle and tendon  
504 may be difficult to achieve via tomographic projections. Therein, hybridization of VP with  
505 filamented light projection (FLight, a technology developed in our group (34)) could allow  
506 one to fabricate the muscle and tendon interfaces with fascicular arrangement of muscle  
507 fibers or aligned collagen in tendons, while the bone can be tomographically projected to  
508 create a porous matrix. In fact, hybridization can also be performed with other printing  
509 techniques (35, 36). For example, extrusion printing of photoresins can be used to control  
510 the spatial distribution of different materials within the resin container. Subsequently, single  
511 tomographic projection can be used to create the multimaterial constructs. Such  
512 hybridization schemes will be the future scope of our investigation. Naturally, for tissue  
513 engineering purposes, imparting a macroscopic vasculature and further inducing  
514 neovascularization (10, 37) will be a key aspect to allow physiological-scale tissue  
515 fabrication.

516  
517 For this work, in order to demonstrate rapid printing, photoclick materials based on step-  
518 growth polymerization were ideal as we have established expertise on high speed volumetric  
519 printing using these materials (17). However, the materials demonstrated in this work may  
520 not be suitable towards all biomedical or structural applications as the modulus is small ( $\sim$   
521 10-100 kPa). Herein, one could also use chain-growth polymerization, which is typically  
522 found in acrylate or methacrylate-based resins, to obtain stiffer structures (38) with minor  
523 compromises on the fabrication duration as the rate of photopolymerization is slow (e.g.  
524 volumetric printing of gelatin methacrylate takes  $\sim 30$  s/cm<sup>3</sup> of construct, while  
525 GelNB/GelSH take  $\sim 8$  s/cm<sup>3</sup> of constructs (17)). Future research on photoclick-compatible  
526 materials or their hybridization schemes, which yield higher stiffness constructs, could  
527 improve the applicability of the materials to a wider variety of biomedical applications such  
528 as polymer-based arterial stents (39) or tracheal grafts (40). Further, current volumetric  
529 printing approaches have been limited to constructs spanning only a few centimeters in  
530 sizes, and future research on tomographic projections within larger containers can  
531 circumvent such size limitations. As such, one also does not need to use volumetric printing  
532 or deploy photocrosslinkable materials. The shapes generated and optimized through the  
533 algorithmic design and computational modeling schemes can be fabricated through  
534 conventional or bespoke manufacturing processes integrated into larger assembly lines, as  
535 long as the complexity of the shape can be achieved. For example, the algorithmic schemes  
536 could help speed up product design and optimization of prosthetic implants or metallic  
537 stents, to even vehicle drive shafts and engines, which could bring about substantial cost-  
538 savings in the product pipeline. This work can potentially transform the way engineers or

539 scientists approach new design problems and develop solutions that have the potential to  
540 benefit society at large.

## 541 **Materials and Methods**

542 **Algorithmic design.** Hyperganic core (an algorithmic engineering platform developed by  
543 Hyperganic GmbH) environment was used to run the algorithmic design schemes written in  
544 C#. Detailed explanations and equations of the algorithms are provided in the Supplemental  
545 Information. We have created graphical user interfaces within Hyperganic core which will  
546 allow users to change the designs of the auxetic and perfusable shapes. User Interfaces have  
547 been created for each design architecture with provision to create designs based on  
548 variations of design parameters (h, t, v, n1, n2, etc.), and are integrated in the Hyperganic  
549 source code shaped on the open-source library. See “Data and materials availability” section  
550 for the sources codes for the design schemes and procedures for opening the graphical user  
551 interfaces to change different designs.

552 **Computational modeling of the structural mechanics of the auxetic meshes.** Numerical  
553 analysis of auxetic meshes has been performed using the simulation kernel of Hyperganic  
554 Core (governing equations for the models are provided in the **Supplementary**  
555 **Information**). The simulation functionality is integrated within the C# API that directly  
556 integrates with the algorithmic design schemes. See “Data and materials availability”  
557 section for the sources codes and procedures for running the codes.

558 **Matrix synthesis.** The norbornene or thiol-modified gelatin were synthesized using  
559 procedures previously established in our lab (17, 41). For formulation of GelNB, porcine-  
560 derived (Type A) gelatin was dissolved in 0.5 M carbonate-bicarbonate buffer (pH~9,  
561 obtained by adding 38.2 g/l of sodium bicarbonate and 4.7d/l of sodium carbonate in  
562 deionized (DI) water) at 50°C to get a 10% w/v solution. After obtaining a clear solution  
563 under stirring, carbic anhydride was added at a concentration of 100 mg/g of gelatin. After  
564 letting the reaction proceed for 1 h, the solution was dialyzed (at 40°C) with frequent DI  
565 water changes (2 per day) for 5 days. The matrix was then lyophilized for 4 days and stored  
566 at -20°C until further use. For formulation of GelSH, porcine-derived (Type A) gelatin was  
567 dissolved in 0.15 M MES (2-(N-morpholino)ethanesulfonic acid) buffer (pH~4) at 50°C to  
568 get a 2% w/v solution. When completely dissolved, DTPHY (3,3'-  
569 Dithiobis(propionohydrazide)) was added at 95 mg/g of gelatin while stirring. When  
570 completely dissolved, EDC (1-Ethyl-3-(3-dimethylaminopropyl)carbodiimide) was added  
571 at 135 mg/g of gelatin while stirring. The reaction is then allow to proceed at 50°C under  
572 stirring for 12 h. Next, TCEP was added at 344 mg/g of gelatin, followed by continuing the  
573 reduction reaction for 6 hours. Finally, 1g of NaCl was added and the solution dialysed  
574 against DI water balanced to pH 4.5 with diluted HCl. The degree of functionalization of  
575 the matrices was determined using <sup>1</sup>H NMR spectroscopy (GelSH DS: 0.276 ± 0.016  
576 mmol/g, GelNB DS: 0.217 ± 0.007 mmol/g, plots provided in supplemental information  
577 **Figure S7**).

578 The GelNB/GelSH resin was formulated by mixing the lyophilized GelNB or GelSH matrix  
579 in PBS to achieve 5% w/v total gelatin concentration. GelNB/PEGSH resin was formulated  
580 by mixing the lyophilized GelNB matrix in PBS at 3.8% w/v and thiolated 4-arm PEG (10  
581 kDa, SinoPEG) at 1.2% w/v. For both resin formulations, 0.05% w/v LAP (Lithium  
582 phenyl(2,4,6-trimethylbenzoyl)phosphinate) was used as the photoinitiator. Rhod- or FITC-  
583 labeled resin was formulated by adding Acryloxyethyl thiocarbonyl Rhodamine B (Rhod-  
584 Acr) or Fluorescein isothiocyanate (FITC) stock in DMSO (at 10 mg/ml) to the resin  
585 formulation at 1 µl/ml. FITC is conjugated to the resin matrix through amide bond formation  
586  
587  
588

589 with the primary amines of the matrix, while Rhod-Acr conjugates to GelSH through thiol-  
590 ene reaction during printing. The amounts of FITC and Rhod-Acr do not affect the light  
591 dose of the resin compared to a non-labeled resin.

592  
593 **Multimat volumetric printing.** The open format volumetric printer from Readily3D was  
594 used for these experiments. This printer allowed for each resin swapping and visualization  
595 of the constructs during and after printing. Procedures for Multimat VP have been discussed  
596 in the results section. Here we provide necessary details for replicability. Prior to printing,  
597 dose tests were performed by projecting an array of circles ( $\phi = 1$  mm) featuring a variation  
598 of light intensity onto a 3 mm path length cuvette filled with the resin. Diameters of the  
599 projected cylinders were then measured using bright field microscopy and the light dose  
600 allowing for the diameter to be  $1 \pm 0.05$  mm (dimensions measured in ImageJ) was chosen.  
601 For all prints, 18 mm printing vials were used. After filling-in the desired volume of the  
602 resin – 4 ml per layer for single material VPs and 3 ml per material for the MultiMat VP  
603 experiments, the resin was allowed to thermo-reversibly crosslink for 5 min at 4°C. This  
604 allowed stability of the printed structure during photocrosslinking. To remove the non-  
605 crosslinked resin (to swap the resin in between different tomographic projections or at the  
606 end of the printing), the vial was kept at 37°C for 5 min, followed by washing with warm  
607 (37°C) PBS twice. The supporting pillars were fabricated in a sequential manner: First a  
608 single circular beam projection at highest laser power permissible by the printing system  
609 ( $64 \text{ mW/cm}^2$ ) was used for 10 s to print the first pillar. The vial was then rotated by 90° and  
610 the projection performed again.

611  
612 **Cell culture and tissue immunohistochemistry.** C2C12 murine myoblasts and NIH 3T3  
613 murine fibroblasts were cultured in Dulbecco's Modified Eagle Medium (DMEM)  
614 supplemented with 10% w/v fetal bovine serum (FBS) and 1% w/v penicillin/streptomycin.  
615 The cells were passaged at 80% confluency using 0.25% w/v trypsin and 0.05% w/v EDTA.  
616 Next, C2C12 and 3T3 cells were labeled with CellTracker™ red and green dyes  
617 (ThermoFisher), respectively, using manufacturer's specifications. The cells were then  
618 resuspended in GelNB/GelSH matrix at 2.5 M cells/ml and the muscle-connective tissue  
619 units volumetrically printed. After 4 weeks of culture, muscle-connective tissue units were  
620 immunohistochemically stained for myosin heavy chain (MyoHC), Collagen I, Actin  
621 filament (Phalloidin) and nuclei (DAPI) based on our previous work (34).

622  
623 **Light Sheet Microscopy.** An axially scanned light sheet microscope (MesoSPIM, V4)(42)  
624 was used to image fluorescently labelled samples. The constructs were mounted onto a  
625 custom printed microscope sample holder and submerged in a quartz cuvette filled with mQ  
626 water, which was then mounted onto the MesoSPIM microscope stand. For imaging, a  
627 macro-zoom system (Olympus MVX-10) and 1x air objective (Olympus MVPLAPO1x)  
628 with adjustable zoom were used. Voltage adjustments using the electrically tunable lens  
629 (ETL) were performed for each run. Step size was chosen from 10 – 50  $\mu\text{m}$ .

## 630 631 **References**

- 632 1. H. Xue, Z. Luo, T. Brown, S. Beier, Design of Self-Expanding Auxetic Stents Using  
633 Topology Optimization. *Front. Bioeng. Biotechnol.* **8**, 736 (2020).
- 634 2. W. Wu, X. Song, J. Liang, R. Xia, G. Qian, D. Fang, Mechanical properties of anti-  
635 tetrachiral auxetic stents. *Compos. Struct.* **185**, 381–392 (2018).
- 636 3. M. Kapnisi, C. Mansfield, C. Marijon, A. G. Guex, F. Perbellini, I. Bardi, E. J. Humphrey,  
637 J. L. Puetzer, D. Mawad, D. C. Koutsogeorgis, D. J. Stuckey, C. M. Terracciano, S. E.  
638 Harding, M. M. Stevens, Auxetic Cardiac Patches with Tunable Mechanical and

- 639 Conductive Properties toward Treating Myocardial Infarction. *Adv. Funct. Mater.* **28**,  
640 1800618 (2018).
- 641 4. P. Chansoria, J. Blackwell, E. L. Etter, E. E. Bonacquisti, N. Jasiewicz, T. Neal, S. A.  
642 Kamal, J. Hoque, S. Varghese, T. Egan, J. Nguyen, Rationally Designed Anisotropic and  
643 Auxetic Hydrogel Patches for Adaptation to Dynamic Organs. *Adv. Funct. Mater.*,  
644 2207590 (2022).
- 645 5. P. Chansoria, E. L. Etter, J. Nguyen, Regenerating dynamic organs using biomimetic  
646 patches. *Trends Biotechnol.* (2021), doi:10.1016/J.TIBTECH.2021.07.001.
- 647 6. Q. Pan, S. T. Chen, F. F. Chen, X. Y. Zhu, Programmable soft bending actuators with  
648 auxetic metamaterials. *Sci. China Technol. Sci. 2020 6312*. **63**, 2518–2526 (2020).
- 649 7. A. Lazarus, P. M. Reis, Soft Actuation of Structured Cylinders through Auxetic Behavior.  
650 *Adv. Eng. Mater.* **17**, 815–820 (2015).
- 651 8. X. Zhao, L. Wei, D. Wen, G. Zhu, Q. Yu, Z. D. Ma, Bending response and energy  
652 absorption of sandwich beams with novel auxetic honeycomb core. *Eng. Struct.* **247**,  
653 113204 (2021).
- 654 9. H. G. Menon, S. Dutta, A. Krishnan, H. M. P., B. Shankar, Proposed auxetic cluster  
655 designs for lightweight structural beams with improved load bearing capacity. *Eng. Struct.*  
656 **260**, 114241 (2022).
- 657 10. P. Datta, B. Ayan, I. T. Ozbolat, Bioprinting for vascular and vascularized tissue  
658 biofabrication. *Acta Biomater.* **51** (2017), pp. 1–20.
- 659 11. D. B. Kolesky, K. A. Homan, M. A. Skylar-Scott, J. A. Lewis, Three-dimensional  
660 bioprinting of thick vascularized tissues. *Proc. Natl. Acad. Sci. U. S. A.* **113**, 3179–84  
661 (2016).
- 662 12. B. E. Kelly, I. Bhattacharya, H. Heidari, M. Shusteff, C. M. Spadaccini, H. K. Taylor,  
663 Volumetric additive manufacturing via tomographic reconstruction. *Science (80-. )*. **363**,  
664 1075–1079 (2019).
- 665 13. P. N. Bernal, P. Delrot, D. Loterie, Y. Li, J. Malda, C. Moser, R. Levato, Volumetric  
666 Bioprinting of Complex Living-Tissue Constructs within Seconds. *Adv. Mater.* **31**,  
667 1904209 (2019).
- 668 14. D. Loterie, P. Delrot, C. Moser, High-resolution tomographic volumetric additive  
669 manufacturing. *Nat. Commun.* **11**, 852 (2020).
- 670 15. M. Shusteff, A. E. M. Browar, B. E. Kelly, J. Henriksson, T. H. Weisgraber, R. M. Panas,  
671 N. X. Fang, C. M. Spadaccini, One-step volumetric additive manufacturing of complex  
672 polymer structures. *Sci. Adv.* **3** (2017),  
673 doi:10.1126/SCIADV.AAO5496/SUPPL\_FILE/AAO5496\_SM.PDF.
- 674 16. L. Rodríguez-Pombo, X. Xu, A. Seijo-Rabina, J. J. Ong, C. Alvarez-Lorenzo, C. Rial, D.  
675 Nieto, S. Gaisford, A. W. Basit, A. Goyanes, Volumetric 3D printing for rapid production  
676 of medicines. *Addit. Manuf.* **52**, 102673 (2022).
- 677 17. R. Rizzo, D. Ruetsche, H. Liu, M. Zenobi-Wong, R. Rizzo, D. Ruetsche, H. Liu, M.  
678 Zenobi-Wong, Optimized Photoclick (Bio)Resins for Fast Volumetric Bioprinting. *Adv.*  
679 *Mater.* **33**, 2102900 (2021).
- 680 18. J. Van Hoorick, P. Gruber, M. Markovic, M. Rollot, G. J. Graulus, M. Vagenende, M.  
681 Tromayer, J. Van Erps, H. Thienpont, J. C. Martins, S. Baudis, A. Ovsianikov, P. Dubruel,  
682 S. Van Vlierberghe, Highly Reactive Thiol-Norbornene Photo-Click Hydrogels: Toward  
683 Improved Processability. *Macromol. Rapid Commun.* **39**, 1800181 (2018).
- 684 19. P. Nuñez Bernal, M. Bouwmeester, J. Madrid-Wolff, M. Falandt, S. Florczak, N. Ginés  
685 Rodríguez, Y. Li, G. Größbacher, R.-A. Samsom, M. van Wolferen, L. van der Laan, P.  
686 Delrot, D. Loterie, J. Malda, C. Moser, B. Spee, R. Levato, P. Bernal, S. Florczak, N.  
687 Rodríguez, Y. Li, G. Größbacher, J. Malda, R. Levato, M. Bouwmeester, M. Falandt, R.  
688 Samsom, M. van Wolferen, B. Spee, J. Madrid-Wolff, C. Moser, L. van der Laan,



- 689 Volumetric Bioprinting of Organoids and Optically Tuned Hydrogels to Build Liver-Like  
690 Metabolic Biofactories. *Adv. Mater.*, 2110054 (2022).
- 691 20. J. Madrid-Wolff, A. Boniface, D. Loterie, P. Delrot, C. Moser, Controlling Light in  
692 Scattering Materials for Volumetric Additive Manufacturing. *Adv. Sci.*, 2105144 (2022).
- 693 21. D. Olvera, M. Sohrabi Molina, G. Hendy, M. G. Monaghan, Electroconductive Melt  
694 Electrowritten Patches Matching the Mechanical Anisotropy of Human Myocardium. *Adv.*  
695 *Funct. Mater.*, 1909880 (2020).
- 696 22. D. N. Düring, M. D. Rocha, F. Dittrich, M. Gahr, R. H. R. Hahnloser, Expansion light  
697 sheet microscopy resolves subcellular structures in large portions of the songbird brain.  
698 *Front. Neuroanat.* **13**, 2 (2019).
- 699 23. A. Düster, E. Rank, B. Szabó, The p-Version of the Finite Element and Finite Cell  
700 Methods. *Encycl. Comput. Mech. Second Ed.*, 1–35 (2017).
- 701 24. N. Korshunova, G. Alaimo, S. B. Hosseini, M. Carraturo, A. Reali, J. Niiranen, F.  
702 Auricchio, E. Rank, S. Kollmannsberger, Image-based numerical characterization and  
703 experimental validation of tensile behavior of octet-truss lattice structures. *Addit. Manuf.*  
704 **41**, 101949 (2021).
- 705 25. N. Ghavidelnia, M. Bodaghi, R. Hedayati, Femur Auxetic Meta-Implants with Tuned  
706 Micromotion Distribution. *Mater. 2021, Vol. 14, Page 114.* **14**, 114 (2020).
- 707 26. H. M. A. Kolken, S. Janbaz, S. M. A. Leeftang, K. Lietaert, H. H. Weinans, A. A. Zadpoor,  
708 Rationally designed meta-implants: a combination of auxetic and conventional meta-  
709 biomaterials. *Mater. Horizons.* **5**, 28–35 (2018).
- 710 27. Human Heart – Download Stl Files, (available at <https://www.ameede.net/human-heart/>).
- 711 28. L. Q. Fu, W. L. Du, M. H. Cai, J. Y. Yao, Y. Y. Zhao, X. Z. Mou, The roles of tumor-  
712 associated macrophages in tumor angiogenesis and metastasis. *Cell. Immunol.* **353**, 104119  
713 (2020).
- 714 29. M. B. Deci, M. Liu, J. Gonya, C. J. Lee, T. Li, S. W. Ferguson, E. E. Bonacquisti, J. Wang,  
715 J. Nguyen, Carrier-Free CXCR4-Targeted Nanoplexes Designed for Polarizing  
716 Macrophages to Suppress Tumor Growth. *Cell. Mol. Bioeng.* **12**, 375–388 (2019).
- 717 30. J. Yu, K. T. Du, Q. Fang, Y. Gu, S. S. Mihardja, R. E. Sievers, J. C. Wu, R. J. Lee, The use  
718 of human mesenchymal stem cells encapsulated in RGD modified alginate microspheres in  
719 the repair of myocardial infarction in the rat. *Biomaterials.* **31**, 7012–7020 (2010).
- 720 31. H. Han, A. D. Jain, M. I. Truica, J. Izquierdo-Ferrer, J. F. Anker, B. Lysy, V. Sagar, Y.  
721 Luan, Z. R. Chalmers, K. Unno, H. Mok, R. Vatapalli, Y. A. Yoo, Y. Rodriguez, I.  
722 Kandela, J. B. Parker, D. Chakravarti, R. K. Mishra, G. E. Schiltz, S. A. Abdulkadir,  
723 Small-Molecule MYC Inhibitors Suppress Tumor Growth and Enhance Immunotherapy.  
724 *Cancer Cell.* **36**, 483-497.e15 (2019).
- 725 32. D. Huang, T. Liu, J. Liao, S. Maharjan, X. Xie, M. Pérez, I. Anaya, S. Wang, A. T. Mayer,  
726 Z. Kang, W. Kong, V. L. Mainardi, C. E. Garciamendez-Mijares, G. G. Martínez, M.  
727 Moretti, W. Zhang, Z. Gu, A. M. Ghaemmaghami, Y. S. Zhang, Reversed-engineered  
728 human alveolar lung-on-a-chip model. *Proc. Natl. Acad. Sci. U. S. A.* **118**, e2016146118  
729 (2021).
- 730 33. J. K. Wilt, C. Yang, G. X. Gu, Accelerating Auxetic Metamaterial Design with Deep  
731 Learning. *Adv. Eng. Mater.* **22**, 1901266 (2020).
- 732 34. H. Liu, P. Chansoria, P. Delrot, E. Angelidakis, R. Rizzo, D. Ruetsche, L. A. Applegate, D.  
733 Loterie, M. Zenobi-Wong, Filamented Light (FLight) Biofabrication of Highly Aligned  
734 Tissue-engineered Constructs. *Adv. Mater.*, 2204301 (2022).
- 735 35. P. Chansoria, K. Schuchard, R. A. Shirwaiker, Process hybridization schemes for  
736 multiscale engineered tissue biofabrication. *WIREs Nanomedicine and Nanobiotechnology*  
737 (2020), doi:10.1002/wnan.1673.
- 738 36. M. Castilho, M. de Ruijter, S. Beirne, C. C. Villette, K. Ito, G. G. Wallace, J. Malda,

- 739 Multitechnology Biofabrication: A New Approach for the Manufacturing of Functional  
740 Tissue Structures? *Trends Biotechnol.* **38** (2020), pp. 1316–1328.
- 741 37. C. O’Connor, E. Brady, Y. Zheng, E. Moore, K. R. Stevens, Engineering the multiscale  
742 complexity of vascular networks. *Nat. Rev. Mater.* **2022** *79*, **7**, 702–716 (2022).
- 743 38. M. Lee, R. Rizzo, F. Surman, M. Zenobi-Wong, Guiding Lights: Tissue Bioprinting Using  
744 Photoactivated Materials. *Chem. Rev.* **120** (2020), pp. 10950–11027.
- 745 39. S. Windecker, A. Latib, E. Kedhi, A. J. Kirtane, D. E. Kandzari, R. Mehran, M. J. Price, A.  
746 Abizaid, D. I. Simon, S. G. Worthley, A. Zaman, M. Hudec, P. Poliacikova, A. K. bin  
747 Abdul Ghapar, K. Selvaraj, I. Petrov, D. Mylotte, E. Pinar, R. Moreno, F. Fabbicocchi, S.  
748 Pasupati, H.-S. Kim, A. Aminian, C. Tie, A. Wlodarczak, S.-H. Hur, S. O. Marx, I.  
749 Jankovic, S. Brar, L. Bousquette, M. Liu, G. W. Stone, Polymer-based or Polymer-free  
750 Stents in Patients at High Bleeding Risk. *N. Engl. J. Med.* **382**, 1208–1218 (2020).
- 751 40. A. Dhasmana, A. Singh, S. Rawal, Biomedical grafts for tracheal tissue repairing and  
752 regeneration “Tracheal tissue engineering: an overview.” *J. Tissue Eng. Regen. Med.* **14**,  
753 653–672 (2020).
- 754 41. R. Rizzo, A. Bonato, P. Chansoria, M. Zenobi-Wong, Macroporous Aligned Hydrogel  
755 Microstrands for 3D Cell Guidance. *ACS Biomater. Sci. Eng.* (2022),  
756 doi:10.1021/ACSBBIOMATERIALS.2C00370.
- 757 42. F. F. Voigt, D. Kirschenbaum, E. Platonova, S. Pagès, R. A. A. Campbell, R. Kastli, M.  
758 Schaettin, L. Egolf, A. van der Bourg, P. Bethge, K. Haenraets, N. Frézel, T. Topilko, P.  
759 Perin, D. Hillier, S. Hildebrand, A. Schueth, A. Roebroek, B. Roska, E. T. Stoeckli, R.  
760 Pizzala, N. Renier, H. U. Zeilhofer, T. Karayannis, U. Ziegler, L. Batti, A. Holtmaat, C.  
761 Lüscher, A. Aguzzi, F. Helmchen, The mesoSPIM initiative: open-source light-sheet  
762 microscopes for imaging cleared tissue. *Nat. Methods* **2019** *1611*, **16**, 1105–1108 (2019).

## 763 Acknowledgments

764 P.C. acknowledges a Marie Skłodowska Curie postdoctoral fellowship (grant number  
765 101024341). M.Z.W. acknowledges ETH Grant application ETH-38 19-1 and Innosuisse  
766 funding application no. 55019.1 IP-ENG for their kind support. D.R. acknowledges Swiss  
767 National Science Foundation project grant 205321\_179012. The authors further  
768 acknowledge the assistance from ETH (ScopeM) imaging facility, and UZH MesoSPIM  
769 light sheet microscopy initiative. We thank Hyperganic Group GmbH for providing the free  
770 academic license to use their Hyperganic Core software.  
771

## 772 Author contributions:

773 Conceptualization: P.C., M.Z.W.

774 Methodology: P.C., D.R., A.W., R.R., H.L., P.W., D.D., N.K., M.Z.W.

775 Investigation: P.C., D.R., A.W., R.R., H.L., P.W., N.K.

776 Visualization: P.C., D.R., A.W., N.K.

777 Supervision: M.Z.W., P.C., N.K.

778 Writing—original draft: P.C., D.R., A.W.

779 Writing—review & editing: M.Z.W., P.C.

780 **Competing interests:** A.W. D.D., and N.K. are employed by Group GmbH.  
781

782 **Data and materials availability:** All data are available in the main text or the  
783 supplementary materials. The source code for the designs and simulations and their  
784 graphical user interfaces, as well as instructions on how to run the code and GUIs have been  
785 provided in the GitHub repository: [https://gitlab.hyperganic.com/hyperganic-  
786 education/hyperganic-partners/auxetic\\_and\\_perfusable\\_shapes](https://gitlab.hyperganic.com/hyperganic-education/hyperganic-partners/auxetic_and_perfusable_shapes). Academic users can  
787  
788

789 contact Hypergenic to obtain login and software access. Other data is available on this  
790 online repository: <https://www.research-collection.ethz.ch/handle/20.500.11850/583621>  
791 (DOI: 10.3929/ethz-b-000583621).  
792
